# Supplementary material for: Statistically driven automated method for catalytic glucose conversion optimisation
Source: Royal Society of Chemistry journal article supplement (doi:10.1039/d4ra06038e), 2024-01-01
Supplement: d4ra06038e1.pdf [file d4ra06038e1.pdf]

# Supporting Information

## Statistical driven automated method for catalytic glucose conversion optimisation

Joseph Install<sup>a,1</sup>, Rui Zhang<sup>a,1</sup>, Jukka Hietala<sup>b</sup> and Timo Repo<sup>a\*</sup>

**a)** Department of Chemistry, University of Helsinki, A. I. Virtasen aukio 1, P.O. Box 55, 00014 Helsinki (Finland), E-mail: [timo.repo@helsinki.fi](mailto:timo.repo@helsinki.fi).

**b)** Neste Oyj, Technology Centre, Kilpilahti, P.O. Box 310, 06101 Porvoo, Finland

**1)** Authors J.Install and R.Zhang Contributed Equally

\*Corresponding author: [timo.repo@helsinki.fi](mailto:timo.repo@helsinki.fi)

## 1. Design of experiment methods

### 1.1 Full Factorial Design

All statistical models were generated using Umetrics Sartorius Modde Pro software. The system characterisation resulting in figures 2, 4, 6 and 7 were using the full factorial model shown in SI1. The method allows efficient screening of multiple optimisation parameters simultaneously in the experimental region by creating a quadratic model using the high and low values of each parameter in different permutations as well as middle point to increase the accuracy of the model. This then allows a response to be predicted within the region, the response within this work is the respective yield of methyl lactate, lactic acid, HMF, levulinic acid and methyl levulinate.

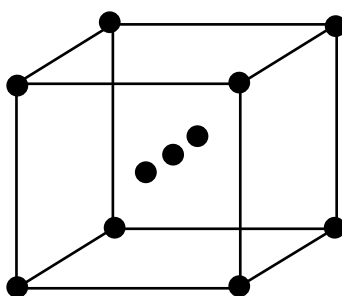

SI 1: Full Factorial statistical design of the experimental region

### 1.2 Combination of multiple full factorial design

Within the study the aim was to model the effect of water concentration on the product distribution using a single Lewis acid catalyst for glucose conversions. Using a single full factorial design and considering the highest power model is quadratic, this would likely return a 'false' peak or lack resolution. Therefore, placing four sequential full factorial designs together as outlined in SI2, allowed a pseudo polynomial model to be created. By combining these models, it also boosted reliability as the corners of each design cube lay within the model space for the next and thus was a repeat for each of these data points. The surface plots of the individual full factorial designs were then placed in order and the full water concentration spectrum was created.

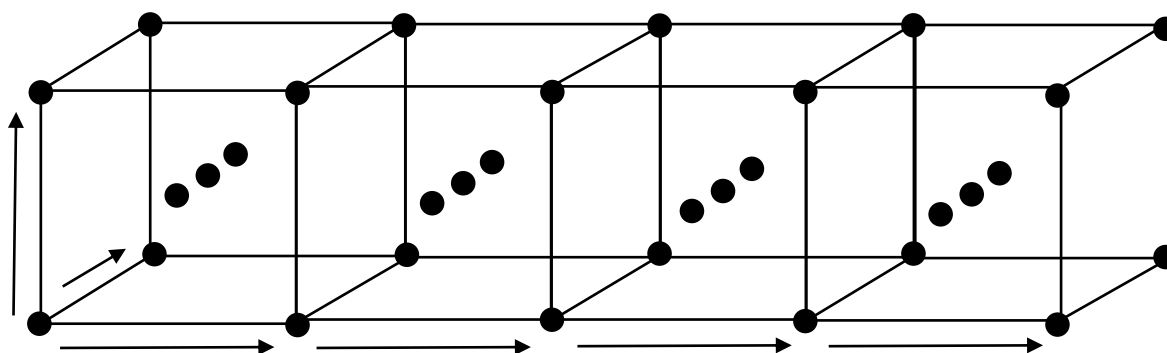

SI 2: Combination of 4 Full Factorial statistical design of the experimental region

### 1.3 D-Optimal Design for Optimised Results

From the outputs of the system characterisation, it was then possible to identify areas of high yields for each respective product. To gain a true optimal prediction a different design of experiment model is required; D-optimal design. This is outlined in SI3 and the points are generated by the statistical software with a model designed to find the optimum.

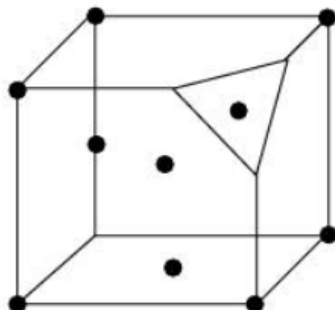

SI 3: D-optimal statistical design of the experimental region

## 2. Experimental Trials

### 2.1 Materials

Analytical standards of Levulinic acid, methyl lactate and lactic acid were purchased from Tokyo Chemical Industry Europe (TCI), methyl levulinate, HMF were purchased from Sigma Aldrich. Glucose and  $\text{SnCl}_4 \cdot 6\text{H}_2\text{O}$  were purchased from Sigma Aldrich. Methanol and ethyl acetate (HPLC grade) were purchased from Fisher Scientific,  $\text{H}_2\text{O}$  used in reactions and HPLC analysis was purified MilliQ type 1.

### 2.2 Automated Chemspeed Swing Synthesis Platform

Experimental runs generated by the statistical modelling software when transferred into an application to run on a Chemspeed Automated Swing platform. The platform is equipped with volumetric liquid handling and gravimetric solid dispensing systems as well as a biotage initiator microwave reactor. Each reaction run was carried out independently under identical controlled conditions. The platform also has workup abilities which added to the automation level of this process.

An example reaction is displayed in the schemes SIX and SIY from the AutoSuite editor on the chemspeed software. Using the gravimetric dispensing unit GDU, the solid materials, glucose and  $\text{SnCl}_4 \cdot 6\text{H}_2\text{O}$  were dispensed in the predefined amounts (100mg and 30mg respectively), into a microwave vial equipped with stirrer bar. After, using the 4-needle head (4NH) coupled with syringe dispensing system, the solvent mixture is dispensed in the amounts defined in the statistical reaction set, for example 2.25mL MeOH and 0.75mL  $\text{H}_2\text{O}$  to make the total reaction volume 3mL. Once the reaction mixture is prepared, using the crimp and transport tool, the vial is capped and transferred to the microwave reactor where the microwave reaction profile is controlled and defined in the AutoSuite editor. Once completed the vial is transferred back to the vial rack where, using the 4NH, 2 sequential analytical sample aliquots are collected through the septa in the microwave vial cap. In a separate 2 tier rack, the sample is diluted in respective GC and HPLC solvents (EtOAc & Phosphate Buffer 50mmol solution) and an internal standard is added to the

GC sample solution. Using the 4NH 1mL of each analytical sample is transferred to an analytical vial in the lower level of the 2-tier rack. These samples are now ready for injection into the GC and HPLC instruments for quantification of products. For efficiency purposes the analytical workup was done in batches of 5 completed reactions.

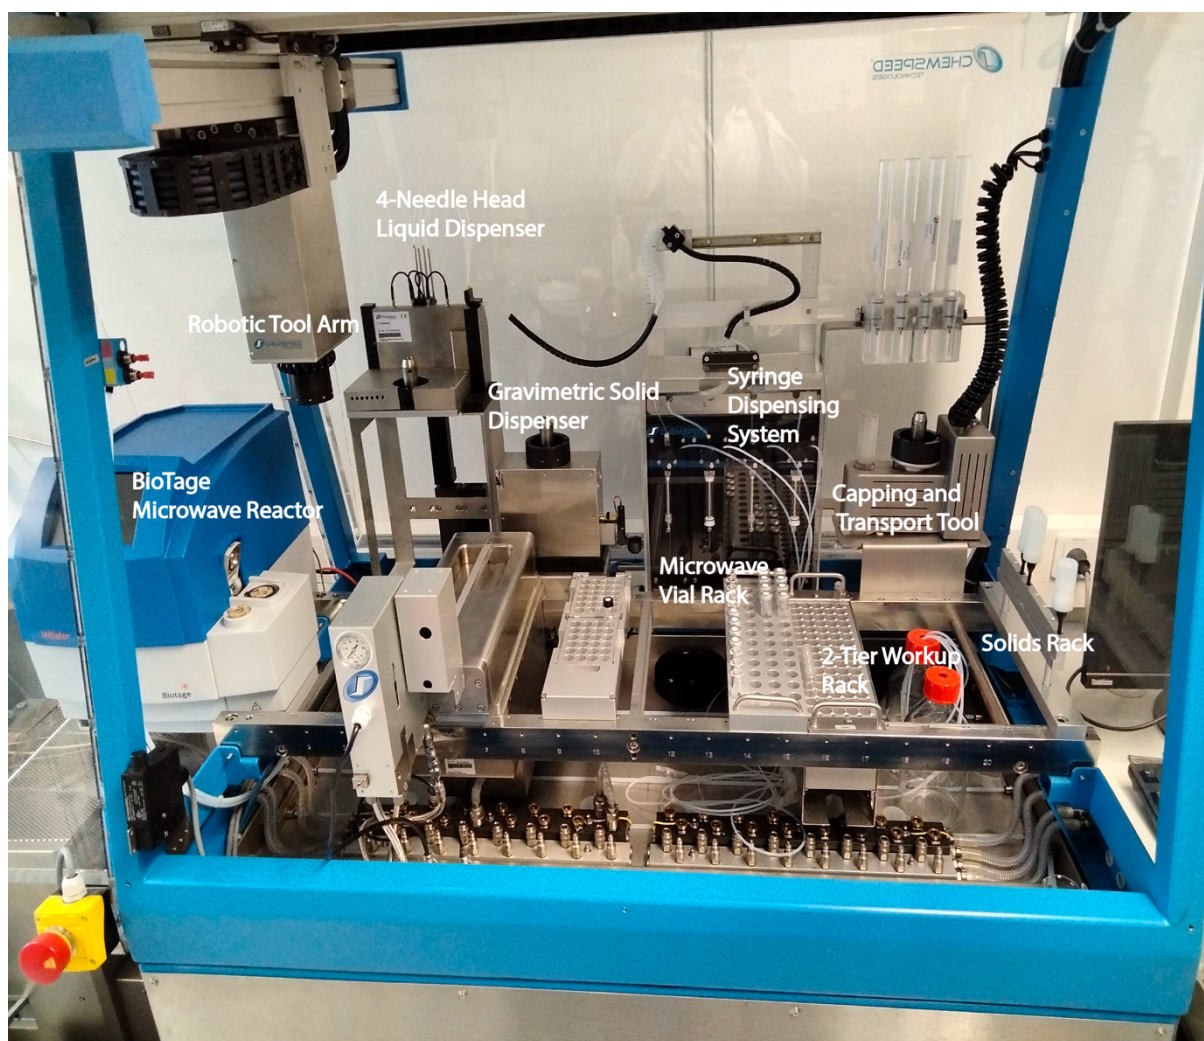

*SI 4: Chemspeed Swing Automated platform equipped with solid and liquid dispensers, microwave reactor*

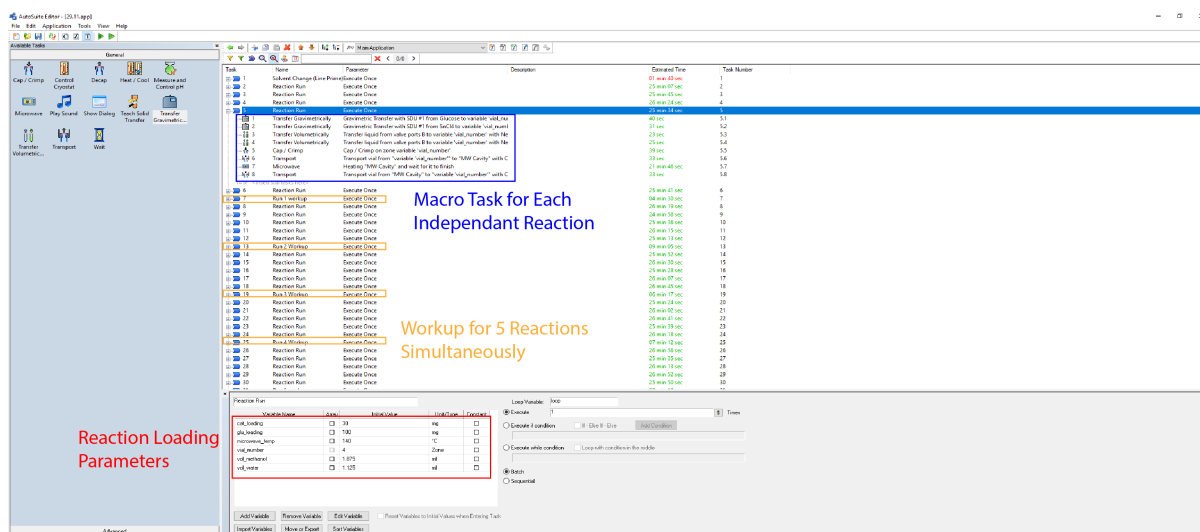

SI 5: Chemspeed Swing Automated platform application editor example for running optimisation reactions

Table SI 1: Quantities and volumes dispensed by the Chemspeed Automated Synthesis platform for the reaction optimization block

| Reaction ID | Glucose Loading / mg | Catalyst Loading / mg | Time MW (min) | Temperature C | MeOH % | Water % | Volume MeOH Dispensed / mL | Volume H2O Dispensed / mL | Glucose conversion % | Analytical Sample Total Volume GC / mL | Analytical Sample Total Volume HPLC / mL | Reaction Aliquot Volume GC / mL | Internal Standard (2,3,4-trichlorobenzene) Addition GC / mL | Reaction Aliquot Volume HPLC / mL |
|-------------|----------------------|-----------------------|---------------|---------------|--------|---------|----------------------------|---------------------------|----------------------|----------------------------------------|------------------------------------------|---------------------------------|-------------------------------------------------------------|-----------------------------------|
| MB_1        | 100                  | 30                    | 15            | 140           | 100    | 0       | 3                          | 0                         | 100.000              | 5.0                                    | 5.0                                      | 0.3                             | 0.1                                                         | 0.5                               |
| MB_2        | 100                  | 30                    | 15            | 160           | 100    | 0       | 3                          | 0                         | 90.284               | 5.0                                    | 5.0                                      | 0.3                             | 0.1                                                         | 0.5                               |
| MB_3        | 100                  | 30                    | 15            | 180           | 100    | 0       | 3                          | 0                         | 78.839               | 5.0                                    | 5.0                                      | 0.3                             | 0.1                                                         | 0.5                               |
| MB_4        | 100                  | 30                    | 15            | 140           | 87.5   | 12.5    | 2.625                      | 0.375                     | 85.636               | 5.0                                    | 5.0                                      | 0.3                             | 0.1                                                         | 0.5                               |
| MB_5        | 100                  | 30                    | 15            | 160           | 87.5   | 12.5    | 2.625                      | 0.375                     | 81.495               | 5.0                                    | 5.0                                      | 0.3                             | 0.1                                                         | 0.5                               |
| MB_6        | 100                  | 30                    | 15            | 180           | 87.5   | 12.5    | 2.625                      | 0.375                     | 97.950               | 5.0                                    | 5.0                                      | 0.3                             | 0.1                                                         | 0.5                               |
| MB_7        | 100                  | 30                    | 15            | 140           | 75     | 25      | 2.25                       | 0.75                      | 60.070               | 5.0                                    | 5.0                                      | 0.3                             | 0.1                                                         | 0.5                               |
| MB_8        | 100                  | 30                    | 15            | 160           | 75     | 25      | 2.25                       | 0.75                      | 65.963               | 5.0                                    | 5.0                                      | 0.3                             | 0.1                                                         | 0.5                               |
| MB_9        | 100                  | 30                    | 15            | 180           | 75     | 25      | 2.25                       | 0.75                      | 85.107               | 5.0                                    | 5.0                                      | 0.3                             | 0.1                                                         | 0.5                               |
| MB_10       | 100                  | 30                    | 15            | 140           | 87.5   | 12.5    | 2.625                      | 0.375                     | 85.425               | 5.0                                    | 5.0                                      | 0.3                             | 0.1                                                         | 0.5                               |
| MB_11       | 100                  | 30                    | 15            | 160           | 87.5   | 12.5    | 2.625                      | 0.375                     | 95.469               | 5.0                                    | 5.0                                      | 0.3                             | 0.1                                                         | 0.5                               |
| MB_12       | 100                  | 30                    | 15            | 180           | 87.5   | 12.5    | 2.625                      | 0.375                     | 98.755               | 5.0                                    | 5.0                                      | 0.3                             | 0.1                                                         | 0.5                               |
| MB_13       | 100                  | 30                    | 15            | 140           | 62.5   | 37.5    | 1.875                      | 1.125                     | 26.967               | 5.0                                    | 5.0                                      | 0.3                             | 0.1                                                         | 0.5                               |
| MB_14       | 100                  | 30                    | 15            | 160           | 62.5   | 37.5    | 1.875                      | 1.125                     | 51.482               | 5.0                                    | 5.0                                      | 0.3                             | 0.1                                                         | 0.5                               |
| MB_15       | 100                  | 30                    | 15            | 180           | 62.5   | 37.5    | 1.875                      | 1.125                     | 79.330               | 5.0                                    | 5.0                                      | 0.3                             | 0.1                                                         | 0.5                               |
| MB_16       | 100                  | 30                    | 15            | 140           | 50     | 50      | 1.5                        | 1.5                       | 19.713               | 5.0                                    | 5.0                                      | 0.3                             | 0.1                                                         | 0.5                               |
| MB_17       | 100                  | 30                    | 15            | 160           | 50     | 50      | 1.5                        | 1.5                       | 40.218               | 5.0                                    | 5.0                                      | 0.3                             | 0.1                                                         | 0.5                               |
| MB_18       | 100                  | 30                    | 15            | 180           | 50     | 50      | 1.5                        | 1.5                       | 72.361               | 5.0                                    | 5.0                                      | 0.3                             | 0.1                                                         | 0.5                               |
| MB_19       | 100                  | 30                    | 15            | 140           | 37.5   | 62.5    | 1.125                      | 1.875                     | 28.753               | 5.0                                    | 5.0                                      | 0.3                             | 0.1                                                         | 0.5                               |
| MB_20       | 100                  | 30                    | 15            | 160           | 37.5   | 62.5    | 1.125                      | 1.875                     | 46.094               | 5.0                                    | 5.0                                      | 0.3                             | 0.1                                                         | 0.5                               |
| MB_21       | 100                  | 30                    | 15            | 180           | 37.5   | 62.5    | 1.125                      | 1.875                     | 75.850               | 5.0                                    | 5.0                                      | 0.3                             | 0.1                                                         | 0.5                               |
| MB_22       | 100                  | 30                    | 15            | 140           | 25     | 75      | 0.75                       | 2.25                      | 16.523               | 5.0                                    | 5.0                                      | 0.3                             | 0.1                                                         | 0.5                               |
| MB_23       | 100                  | 30                    | 15            | 160           | 25     | 75      | 0.75                       | 2.25                      | 47.104               | 5.0                                    | 5.0                                      | 0.3                             | 0.1                                                         | 0.5                               |
| MB_24       | 100                  | 30                    | 15            | 180           | 25     | 75      | 0.75                       | 2.25                      | 76.369               | 5.0                                    | 5.0                                      | 0.3                             | 0.1                                                         | 0.5                               |
| MB_25       | 100                  | 30                    | 15            | 140           | 12.5   | 87.5    | 0.375                      | 2.625                     | 20.031               | 5.0                                    | 5.0                                      | 0.3                             | 0.1                                                         | 0.5                               |
| MB_26       | 100                  | 30                    | 15            | 160           | 12.5   | 87.5    | 0.375                      | 2.625                     | 46.684               | 5.0                                    | 5.0                                      | 0.3                             | 0.1                                                         | 0.5                               |
| MB_27       | 100                  | 30                    | 15            | 180           | 12.5   | 87.5    | 0.375                      | 2.625                     | 76.952               | 5.0                                    | 5.0                                      | 0.3                             | 0.1                                                         | 0.5                               |
| MB_28       | 100                  | 30                    | 15            | 140           | 0      | 100     | 0                          | 3                         | 18.846               | 5.0                                    | 5.0                                      | 0.3                             | 0.1                                                         | 0.5                               |
| MB_29       | 100                  | 30                    | 15            | 160           | 0      | 100     | 0                          | 3                         | 46.183               | 5.0                                    | 5.0                                      | 0.3                             | 0.1                                                         | 0.5                               |
| MB_30       | 100                  | 30                    | 15            | 180           | 0      | 100     | 0                          | 3                         | 67.200               | 5.0                                    | 5.0                                      | 0.3                             | 0.1                                                         | 0.5                               |

Solid Dispensed by Chemspeed Gravimetric Dispensing Unit

Liquid Dispensed by Chemspeed Volumetric Liquid Dispenser

**Table SI 2:** Quantities and volumes dispensed by the Chemspeed Automated Synthesis platform for the methyl lactate optimization block

| Reaction ID | Glucose Loading / mg | Catalyst Loading / mg | Time MW (min) | Temperature C | MeOH % | Water % | Volume MeOH Dispensed / mL | Volume H2O Dispensed / mL | Glucose conversion % | Analytical Sample Total Volume GC / mL | Analytical Sample Total Volume HPLC / mL | Reaction Aliquot Volume GC / mL | Internal Standard (2,3,4-trichlorobenzene) Addition GC / mL | Reaction Aliquot Volume HPLC / mL | Methyl Lactate Yield / mol % |
|-------------|----------------------|-----------------------|---------------|---------------|--------|---------|----------------------------|---------------------------|----------------------|----------------------------------------|------------------------------------------|---------------------------------|-------------------------------------------------------------|-----------------------------------|------------------------------|
| MLO_1       | 100                  | 30                    | 15            | 140.0         | 97.5   | 2.5     | 2.925                      | 0.075                     | 93.7                 | 5.0                                    | 5.0                                      | 0.3                             | 0.1                                                         | 0.5                               | 37.5                         |
| MLO_2       | 100                  | 30                    | 15            | 140.0         | 90     | 10      | 2.7                        | 0.3                       | 94.0                 | 5.0                                    | 5.0                                      | 0.3                             | 0.1                                                         | 0.5                               | 42.8                         |
| MLO_3       | 100                  | 30                    | 15            | 180.0         | 97.5   | 2.5     | 2.925                      | 0.075                     | 98.4                 | 5.0                                    | 5.0                                      | 0.3                             | 0.1                                                         | 0.5                               | 46.9                         |
| MLO_4       | 100                  | 30                    | 15            | 180.0         | 90     | 10      | 2.7                        | 0.3                       | 98.0                 | 5.0                                    | 5.0                                      | 0.3                             | 0.1                                                         | 0.5                               | 68.6                         |
| MLO_5       | 100                  | 30                    | 15            | 166.7         | 97.5   | 2.5     | 2.925                      | 0.075                     | 96.2                 | 5.0                                    | 5.0                                      | 0.3                             | 0.1                                                         | 0.5                               | 56.6                         |
| MLO_6       | 100                  | 30                    | 15            | 153.3         | 90     | 10      | 2.7                        | 0.3                       | 95.7                 | 5.0                                    | 5.0                                      | 0.3                             | 0.1                                                         | 0.5                               | 58.8                         |
| MLO_7       | 100                  | 30                    | 15            | 166.7         | 90     | 10      | 2.7                        | 0.3                       | 96.3                 | 5.0                                    | 5.0                                      | 0.3                             | 0.1                                                         | 0.5                               | 59.6                         |
| MLO_8       | 100                  | 30                    | 15            | 140.0         | 92.5   | 7.5     | 2.775                      | 0.225                     | 94.4                 | 5.0                                    | 5.0                                      | 0.3                             | 0.1                                                         | 0.5                               | 51.4                         |
| MLO_9       | 100                  | 30                    | 15            | 180.0         | 95     | 5       | 2.85                       | 0.15                      | 98.5                 | 5.0                                    | 5.0                                      | 0.3                             | 0.1                                                         | 0.5                               | 57.8                         |
| MLO_10      | 100                  | 30                    | 15            | 180.0         | 92.5   | 7.5     | 2.775                      | 0.225                     | 98.2                 | 5.0                                    | 5.0                                      | 0.3                             | 0.1                                                         | 0.5                               | 74.5                         |
| MLO_11      | 100                  | 30                    | 15            | 160.0         | 93.75  | 6.25    | 2.8125                     | 0.1875                    | 95.9                 | 5.0                                    | 5.0                                      | 0.3                             | 0.1                                                         | 0.5                               | 64.4                         |
| MLO_12      | 100                  | 30                    | 15            | 160.0         | 93.75  | 6.25    | 2.8125                     | 0.1875                    | 95.6                 | 5.0                                    | 5.0                                      | 0.3                             | 0.1                                                         | 0.5                               | 64.2                         |
| MLO_13      | 100                  | 30                    | 15            | 160.0         | 93.75  | 6.25    | 2.8125                     | 0.1875                    | 96.5                 | 5.0                                    | 5.0                                      | 0.3                             | 0.1                                                         | 0.5                               | 64.0                         |

 Solid Dispensed by Chemspeed Gravimetric Dispensing Unit

 Liquid Dispensed by Chemspeed Volumetric Liquid Dispenser

**Table SI 3:** Quantities and volumes dispensed by the Chemspeed Automated Synthesis platform for the levulinic acid optimization block

| Reaction ID | Glucose Loading / mg | Catalyst Loading / mg | Time MW (min) | Temperature C | MeOH % | Water % | HCl Addition / mL | Volume MeOH Dispensed / mL | Volume H2O Dispensed / mL | Glucose conversion % | Analytical Sample Total Volume GC / mL | Analytical Sample Total Volume HPLC / mL | Reaction Aliquot Volume GC / mL | Internal Standard (2,3,4-trichlorobenzene) Addition GC / mL | Reaction Aliquot Volume HPLC / mL | Levulinic Acid Yield / mol % |
|-------------|----------------------|-----------------------|---------------|---------------|--------|---------|-------------------|----------------------------|---------------------------|----------------------|----------------------------------------|------------------------------------------|---------------------------------|-------------------------------------------------------------|-----------------------------------|------------------------------|
| LEVO_1      | 100                  | 30                    | 15            | 180.0         | 0      | 100     | 0.039             | 0                          | 3                         | 98.2                 | 5.0                                    | 5.0                                      | 0.3                             | 0.1                                                         | 0.5                               | 48.3                         |
| LEVO_2      | 100                  | 30                    | 15            | 200.0         | 0      | 100     | 0.039             | 0                          | 3                         | 100.0                | 5.0                                    | 5.0                                      | 0.3                             | 0.1                                                         | 0.5                               | 57.3                         |
| LEVO_3      | 100                  | 30                    | 15            | 180.0         | 0      | 100     | 0.117             | 0                          | 3                         | 98.4                 | 5.0                                    | 5.0                                      | 0.3                             | 0.1                                                         | 0.5                               | 60.9                         |
| LEVO_4      | 100                  | 30                    | 15            | 200.0         | 0      | 100     | 0.117             | 0                          | 3                         | 99.4                 | 5.0                                    | 5.0                                      | 0.3                             | 0.1                                                         | 0.5                               | 60.8                         |
| LEVO_5      | 100                  | 30                    | 15            | 180.0         | 0      | 100     | 0.091             | 0                          | 3                         | 100.0                | 5.0                                    | 5.0                                      | 0.3                             | 0.1                                                         | 0.5                               | 49.1                         |
| LEVO_6      | 100                  | 30                    | 15            | 200.0         | 0      | 100     | 0.065             | 0                          | 3                         | 100.0                | 5.0                                    | 5.0                                      | 0.3                             | 0.1                                                         | 0.5                               | 63.0                         |
| LEVO_7      | 100                  | 30                    | 15            | 200.0         | 0      | 100     | 0.091             | 0                          | 3                         | 100.0                | 5.0                                    | 5.0                                      | 0.3                             | 0.1                                                         | 0.5                               | 60.8                         |
| LEVO_8      | 100                  | 30                    | 15            | 186.6         | 0      | 100     | 0.039             | 0                          | 3                         | 93.5                 | 5.0                                    | 5.0                                      | 0.3                             | 0.1                                                         | 0.5                               | 53.2                         |
| LEVO_9      | 100                  | 30                    | 15            | 193.3         | 0      | 100     | 0.039             | 0                          | 3                         | 97.3                 | 5.0                                    | 5.0                                      | 0.3                             | 0.1                                                         | 0.5                               | 59.5                         |
| LEVO_10     | 100                  | 30                    | 15            | 193.3         | 0      | 100     | 0.117             | 0                          | 3                         | 100.0                | 5.0                                    | 5.0                                      | 0.3                             | 0.1                                                         | 0.5                               | 57.2                         |
| LEVO_11     | 100                  | 30                    | 15            | 190.0         | 0      | 100     | 0.078             | 0                          | 3                         | 98.6                 | 5.0                                    | 5.0                                      | 0.3                             | 0.1                                                         | 0.5                               | 60.4                         |
| LEVO_12     | 100                  | 30                    | 15            | 190.0         | 0      | 100     | 0.078             | 0                          | 3                         | 98.6                 | 5.0                                    | 5.0                                      | 0.3                             | 0.1                                                         | 0.5                               | 62.0                         |
| LEVO_13     | 100                  | 30                    | 15            | 190.0         | 0      | 100     | 0.078             | 0                          | 3                         | 100.0                | 5.0                                    | 5.0                                      | 0.3                             | 0.1                                                         | 0.5                               | 63.6                         |

 Solid Dispensed by Chemspeed Gravimetric Dispensing Unit

 Liquid Dispensed by Chemspeed Volumetric Liquid Dispenser

Table SI 4: Mass Balance for the Main Block of Optimization carried out on the Chemspeed Platform

| Reaction ID | Glucose Loading / mg | Temperature C | Water / % | Conversion of Glucose / % | Mass Glucose Converted / mg | Mass Lactic Acid / Mg | Mass Levulinic Acid / mg | Mass HMF / mg | Mass Methyl Levulinate / mg | Mass Methyl Lactate / mg | Mass Formic / mg | Mass of Unidentified Products / Mg |
|-------------|----------------------|---------------|-----------|---------------------------|-----------------------------|-----------------------|--------------------------|---------------|-----------------------------|--------------------------|------------------|------------------------------------|
| MB 1        | 100                  | 140           | 0         | 100.0                     | 100.0                       | 0.7                   | 1.3                      | 14.2          | 14.1                        | 20.6                     | 5.3              | 43.70                              |
| MB 2        | 100                  | 160           | 0         | 90.3                      | 90.3                        | 1.4                   | 2.6                      | 9.2           | 20.8                        | 28.6                     | 8.0              | 19.57                              |
| MB 3        | 100                  | 180           | 0         | 78.8                      | 78.8                        | 0.6                   | 1.3                      | 14.6          | 3.6                         | 20.9                     | 1.6              | 36.27                              |
| MB 4        | 100                  | 140           | 12.5      | 85.6                      | 85.6                        | 2.3                   | 6.3                      | 12.1          | 5.7                         | 25.7                     | 3.5              | 30.00                              |
| MB 5        | 100                  | 160           | 12.5      | 81.5                      | 81.5                        | 2.1                   | 6.2                      | 13.8          | 5.1                         | 23.0                     | 3.3              | 28.05                              |
| MB 6        | 100                  | 180           | 12.5      | 97.9                      | 97.9                        | 3.0                   | 9.2                      | 8.7           | 7.0                         | 30.2                     | 4.7              | 35.12                              |
| MB 7        | 100                  | 140           | 25        | 60.1                      | 60.1                        | 0.4                   | 0.3                      | 12.4          | 2.3                         | 3.8                      | 0.9              | 39.87                              |
| MB 8        | 100                  | 160           | 25        | 66.0                      | 66.0                        | 1.6                   | 2.5                      | 13.0          | 8.1                         | 5.6                      | 3.4              | 31.81                              |
| MB 9        | 100                  | 180           | 25        | 85.1                      | 85.1                        | 1.6                   | 1.9                      | 20.0          | 20.5                        | 10.5                     | 7.7              | 22.93                              |
| MB 10       | 100                  | 160           | 12.5      | 85.4                      | 85.4                        | 1.7                   | 4.7                      | 11.4          | 5.6                         | 27.0                     | 3.1              | 31.90                              |
| MB 11       | 100                  | 160           | 12.5      | 95.5                      | 95.5                        | 2.1                   | 5.7                      | 8.3           | 8.6                         | 26.3                     | 4.4              | 40.08                              |
| MB 12       | 100                  | 160           | 12.5      | 98.8                      | 98.8                        | 3.1                   | 8.7                      | 8.5           | 10.4                        | 31.8                     | 5.8              | 30.53                              |
| MB 13       | 100                  | 140           | 37.5      | 27.0                      | 27.0                        | 0.0                   | 0.7                      | 10.4          | 1.2                         | 1.7                      | 0.6              | 12.33                              |
| MB 14       | 100                  | 160           | 37.5      | 51.5                      | 51.5                        | 0.0                   | 1.6                      | 14.1          | 4.6                         | 1.2                      | 2.0              | 27.94                              |
| MB 15       | 100                  | 180           | 37.5      | 79.3                      | 79.3                        | 0.0                   | 2.9                      | 19.4          | 15.6                        | 1.0                      | 6.2              | 34.24                              |
| MB 16       | 100                  | 140           | 50        | 19.7                      | 19.7                        | 0.0                   | 1.0                      | 10.0          | 0.0                         | 2.4                      | 0.2              | 6.05                               |
| MB 17       | 100                  | 160           | 50        | 40.2                      | 40.2                        | 0.0                   | 2.9                      | 14.0          | 2.5                         | 1.1                      | 1.6              | 18.13                              |
| MB 18       | 100                  | 180           | 50        | 72.4                      | 72.4                        | 0.0                   | 4.1                      | 19.7          | 16.2                        | 0.7                      | 6.7              | 24.85                              |
| MB 19       | 100                  | 140           | 62.5      | 28.8                      | 28.8                        | 0.0                   | 3.6                      | 6.4           | 0.0                         | 1.4                      | 0.9              | 16.55                              |
| MB 20       | 100                  | 160           | 62.5      | 46.1                      | 46.1                        | 0.0                   | 2.6                      | 12.2          | 1.8                         | 1.1                      | 1.3              | 27.16                              |
| MB 21       | 100                  | 180           | 62.5      | 75.9                      | 75.9                        | 0.0                   | 9.3                      | 17.4          | 21.8                        | 0.6                      | 10.0             | 16.85                              |
| MB 22       | 100                  | 140           | 75        | 16.5                      | 16.5                        | 0.0                   | 1.2                      | 10.7          | 1.7                         | 0.8                      | 0.9              | 1.17                               |
| MB 23       | 100                  | 160           | 75        | 47.1                      | 47.1                        | 0.0                   | 4.2                      | 13.1          | 2.2                         | 0.9                      | 1.8              | 24.99                              |
| MB 24       | 100                  | 180           | 75        | 76.4                      | 76.4                        | 0.0                   | 11.6                     | 13.8          | 18.7                        | 0.6                      | 9.4              | 22.24                              |
| MB 25       | 100                  | 140           | 87.5      | 20.0                      | 20.0                        | 0.0                   | 1.0                      | 11.3          | 1.4                         | 2.4                      | 0.7              | 3.20                               |
| MB 26       | 100                  | 160           | 87.5      | 46.7                      | 46.7                        | 0.0                   | 8.4                      | 14.3          | 2.6                         | 0.9                      | 2.9              | 17.59                              |
| MB 27       | 100                  | 180           | 87.5      | 77.0                      | 77.0                        | 0.0                   | 18.0                     | 9.1           | 12.0                        | 1.1                      | 8.6              | 28.14                              |
| MB 28       | 100                  | 140           | 100       | 18.8                      | 18.8                        | 0.0                   | 5.2                      | 13.6          | 0.0                         | 0.0                      | 1.3              | 0.00                               |
| MB 29       | 100                  | 160           | 100       | 46.2                      | 46.2                        | 0.0                   | 14.0                     | 13.4          | 0.0                         | 0.0                      | 3.4              | 15.31                              |
| MB 30       | 100                  | 180           | 100       | 67.2                      | 67.2                        | 0.0                   | 41.5                     | 7.6           | 0.0                         | 0.0                      | 10.0             | 8.08                               |

Table SI 5: Mass Balance for the Optimization of Methyl Lactate carried out on the Chemspeed Platform

| Time (min) | Glucose Loading / mg (mg) | Catalyst Loading / mg (mg) | Temp / °C | Water % | Glucose Conversion / % | Mass HMF / mg | Mass LevA / mg | Mass Formic Acid / mg | Mass Mlev / mg | Mass Lactic Acid / mg | Mass of Mlac / mg | Mass of H <sub>2</sub> O / mg | Total Mass / mg | Mass Unidentified Products / mg |
|------------|---------------------------|----------------------------|-----------|---------|------------------------|---------------|----------------|-----------------------|----------------|-----------------------|-------------------|-------------------------------|-----------------|---------------------------------|
| 5          | 100                       | 30                         | 180       | 7.5     | 100%                   | 3.1           | 3.4            | 2.8                   | 4.1            | 3.8                   | 28.3              | 7.9                           | 53.50           | 46.50                           |
| 10         | 100                       | 30                         | 180       | 7.5     | 100%                   | 3.1           | 5.4            | 7.0                   | 13.8           | 5.1                   | 35.5              | 11.0                          | 80.92           | 19.08                           |
| 20         | 100                       | 30                         | 180       | 7.5     | 100%                   | 3.1           | 4.6            | 6.3                   | 12.7           | 5.3                   | 34.0              | 10.4                          | 76.37           | 23.63                           |
| 30         | 100                       | 30                         | 180       | 7.5     | 100%                   | 2.7           | 4.1            | 6.4                   | 13.4           | 5.0                   | 34.0              | 10.2                          | 75.70           | 24.30                           |
| 5          | 100                       | 10                         | 180       | 7.5     | 100%                   | 3.1           | 3.1            | 2.0                   | 2.3            | 4.4                   | 32.6              | 8.2                           | 55.74           | 44.26                           |
| 10         | 100                       | 10                         | 180       | 7.5     | 100%                   | 2.9           | 2.9            | 4.4                   | 9.1            | 2.9                   | 24.7              | 7.7                           | 54.44           | 45.56                           |
| 20         | 100                       | 10                         | 180       | 7.5     | 100%                   | 2.6           | 2.6            | 2.1                   | 2.9            | 2.2                   | 32.5              | 7.9                           | 52.86           | 47.14                           |
| 30         | 100                       | 10                         | 180       | 7.5     | 100%                   | 2.8           | 2.8            | 2.1                   | 2.8            | 1.2                   | 32.5              | 8.1                           | 52.27           | 47.73                           |

### 2.3 Microwave Reactions

Microwave reactions were carried out in the biotage initiator microwave reactor controlled on the Chemspeed platform. These were fixed to 150W power and limited to 20 bar of pressure for safety reasons.

## 3 Analysis and Quantifications

### 3.1 HPLC Analysis

For the organic acids HPLC analysis was carried out using an Agilent 1200 series HPLC with DAD and RID detectors equipped with a Thermo Scientific Acclaim mixed mode WAX-1 HPLC column (120am 4.6x150mm) with a 5% ACN phosphate buffer solution at pH 5.5. DAD was used to detect the product components and quantify using an external calibration curve. Conversions were also calculated using HPLC for glucose quantification using RID detector in each of the reaction samples.

Samples were prepared for analysis by extracting a 0.1mL aliquot and diluting to 5mL using the Chemspeed platform. This was then filtered using 0.2µm hydrophilic syringe filters and injected into the HPLC.

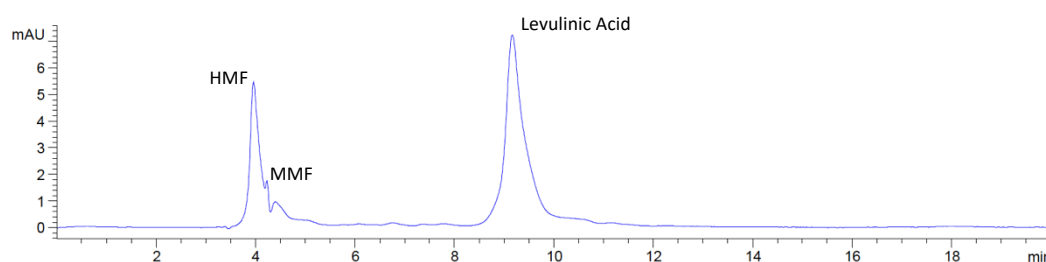

*SI 6: Example HPLC Chromatogram of the reaction mixture using Acclaim mixed mode WAX-1 column with a 5% ACN Phosphate Buffer Mobile Phase pH 5.5, UV 230nm. Reaction Conditions: 100mg glucose, 30mg SnCl<sub>4</sub>·6H<sub>2</sub>O with 3mL H<sub>2</sub>O, 10min MW 180°C*

### 3.3 GC Analysis

The esters, methyl lactate, methyl levulinate and HMF were quantified using gas chromatography for peak definition and accuracy of quantification. For this an Agilent 7890B GC equipped with flame ionisation detector was used for high quality detection and quantification. The column used was an Agilent J&W GC HP Column, length 30m, diameter 0.25mm and 0.25µm film. An internal standard of 2,3,5-trichloro benzene was used and quantifications made using external quantification with respect to the internal standard for high precision quantifications. The quantifications were also made in parallel with HPLC conversion analysis using the RID detection.

Examples GC-MS Chromatogram for the product identification, whereby quantifications carried out in GC-FID under identical column and methods.



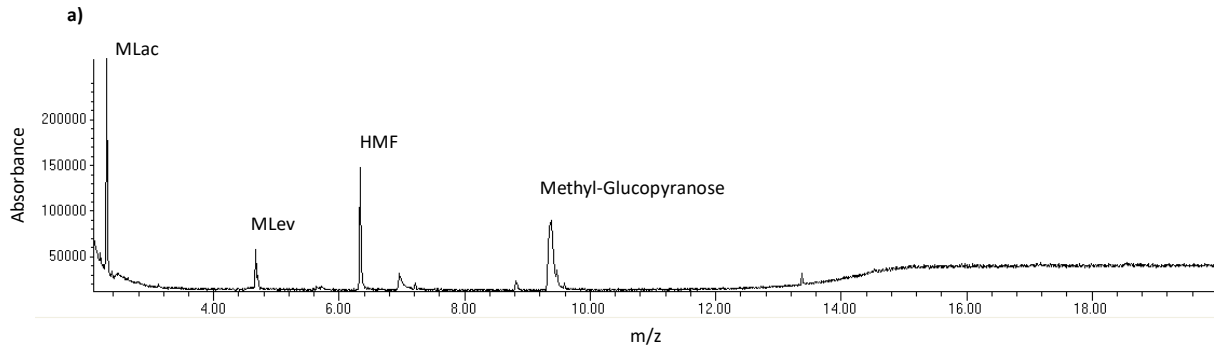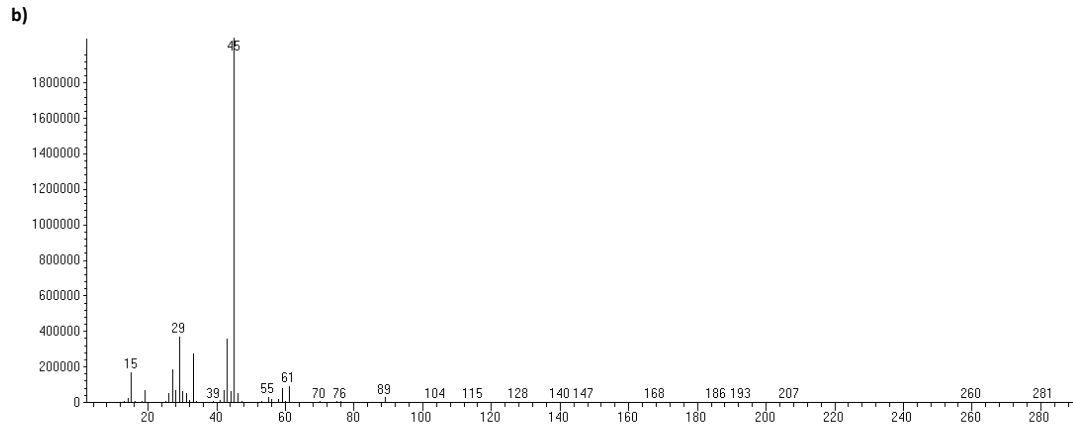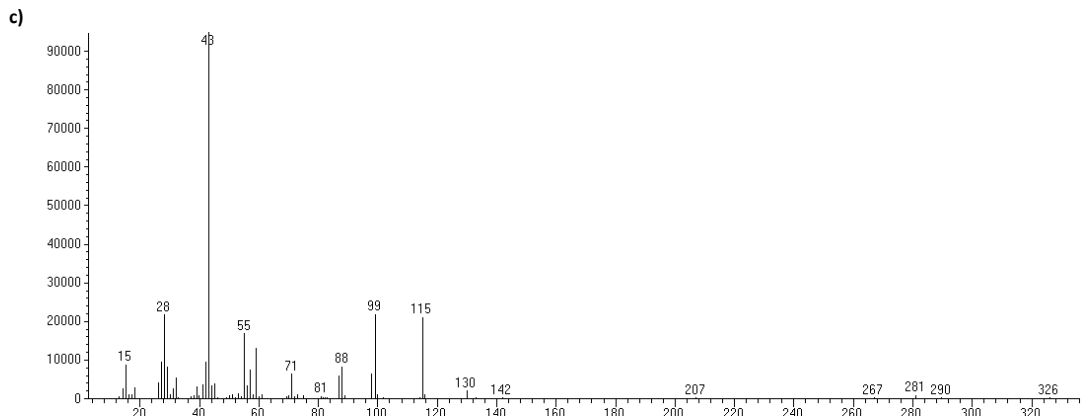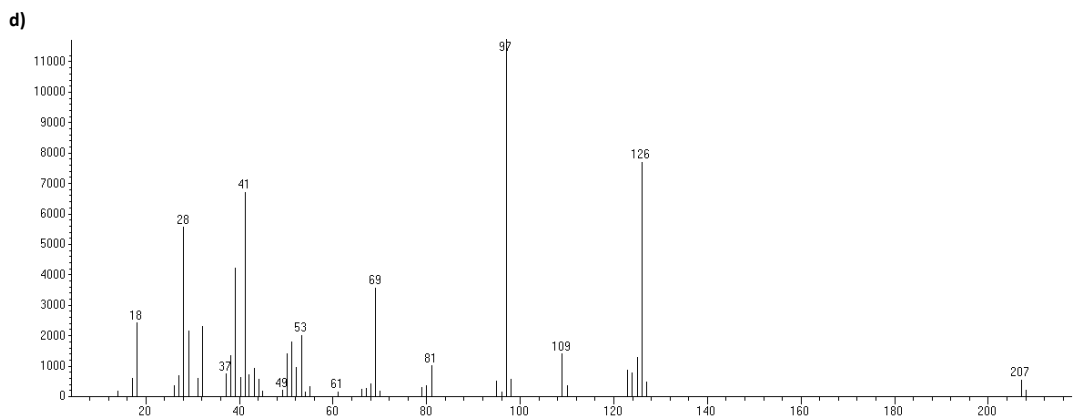

**SI 7:** Example GC-MS Chromatogram of the reaction mixture. Reaction Conditions: 100mg glucose, 30mg  $\text{SnCl}_4 \cdot 6\text{H}_2\text{O}$  with 2mL MeOH & 1mL  $\text{H}_2\text{O}$ , 15min MW 180°C a) GC Chromatogram showing product retention times b) MS spectrum of Methyl Lactate c) MS spectrum of Methyl Levulinate d) MS spectrum of hydroxymethylfurfural (HMF)

## 5 Metal Chloride Screening Trials for methyl lactate

*Table SI 6: Yields for catalyst candidates screened for methyl lactate production*

| Catalyst                              | Yield (mol%) |
|---------------------------------------|--------------|
| ZrCl <sub>4</sub>                     | 6.7          |
| H <sub>2</sub> MoO <sub>4</sub>       | 4.4          |
| MnCl <sub>2</sub> · 4H <sub>2</sub> O | 4.2          |
| NiCl <sub>2</sub> · 6H <sub>2</sub> O | 5.2          |
| GeCl <sub>2</sub>                     | 4.3          |
| CsCl                                  | 4.0          |
| InCl <sub>3</sub>                     | 5.8          |
| YbCl <sub>3</sub>                     | 5.1          |
| AlCl <sub>3</sub> · 6H <sub>2</sub> O | 3.5          |
| SnCl <sub>4</sub> · 5H <sub>2</sub> O | 24.8         |

Reaction conditions: 200mg Glucose, 30mg Catalyst, 3mL MeOH, 160°C for 15 minutes MW

## 6 Additional Contour plots for Lactic acid, HMF and Methyl levulinate

### 6.1. Lactic Acid

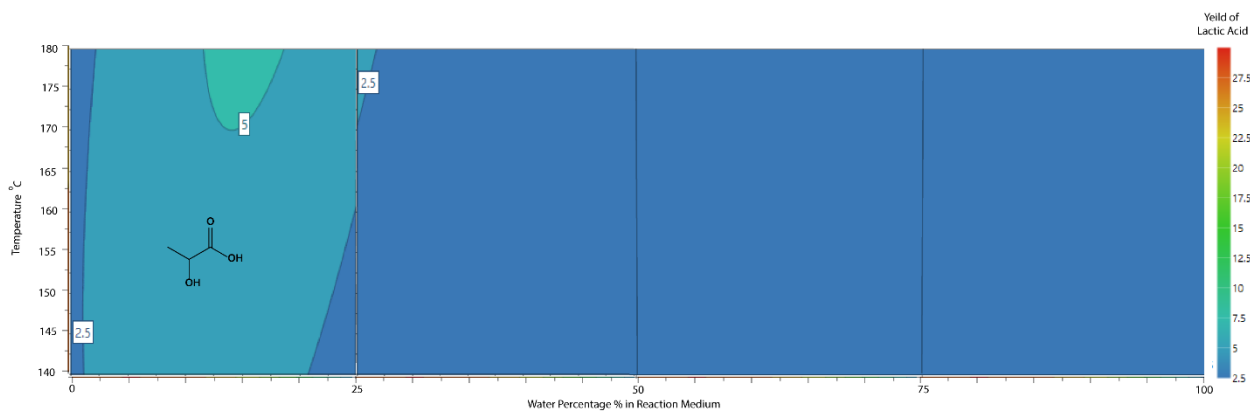

**SI 8:** Response contour plot of lactic acid yield (mol%) as a response to water percentage (3mL total volume) and temperature. Reaction conditions: Glucose 0.5mmol,  $\text{SnCl}_4 \cdot 5\text{H}_2\text{O}$  15mol%, 3mL reaction volume MeOH/ $\text{H}_2\text{O}$ , temperature 140-180°C, 15min MW

### 6.2 HMF

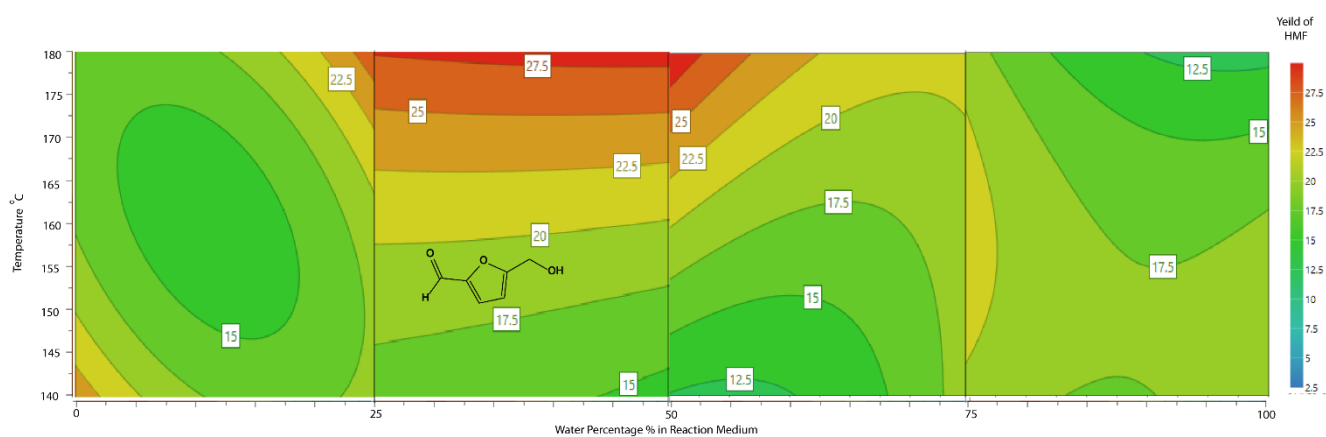

**SI 9:** Response contour plot of HMF yield (mol%) as a response to water percentage (3mL total volume) and temperature. Reaction conditions: Glucose 0.5mmol,  $\text{SnCl}_4 \cdot 5\text{H}_2\text{O}$  15mol%, 3mL reaction volume MeOH/ $\text{H}_2\text{O}$ , temperature 140-180°C, 15min MW

## 6.3 Methyl Levulinate

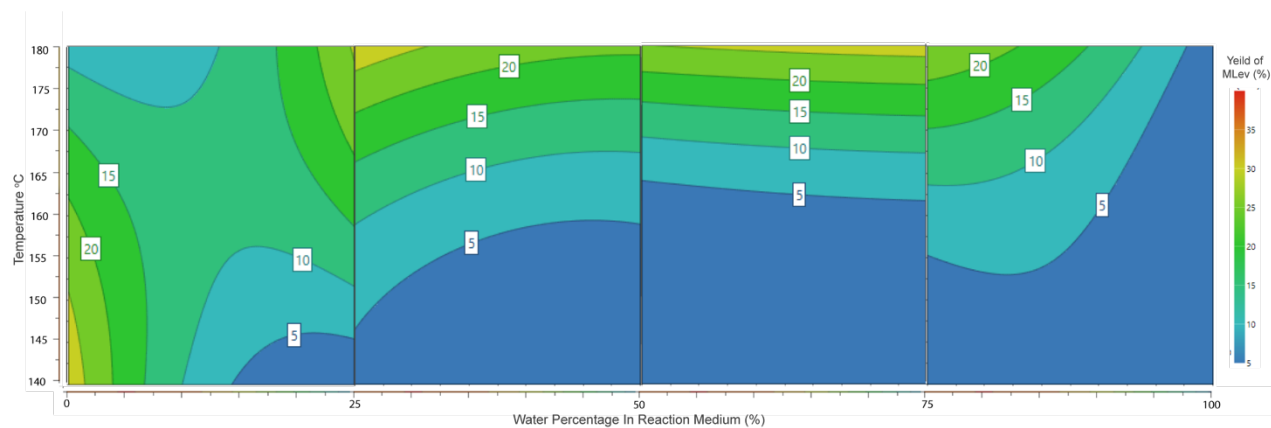

**SI 10:** Response contour plot of Methyl Levulinate yield (mol%) as a response to water percentage (3mL total volume) and temperature.  
Reaction conditions: Glucose 0.5mmol, SnCl<sub>4</sub>·5H<sub>2</sub>O 15mol%, 3mL reaction volume MeOH/H<sub>2</sub>O, temperature 140-180°C, 15min MW

## 7 X-Ray Diffraction Spectrum

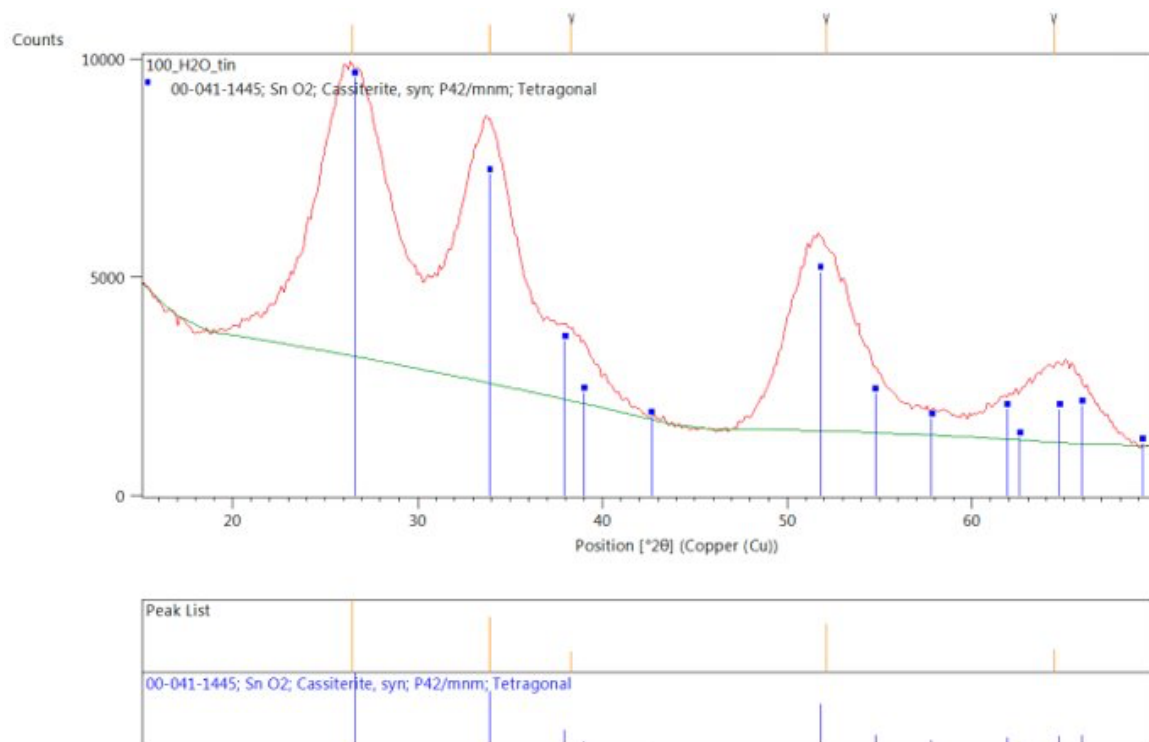

SI 11: XRD of SnCl<sub>4</sub>·5H<sub>2</sub>O after heating in H<sub>2</sub>O at 160°C for 15 mins MW with SnO<sub>2</sub> (00-041-1445) peak signal correlation
